# Supplementary material for: The Multifunctional Effect of Porous Additives on the Alleviation of Ammonia and Sulfate Co-Inhibition in Anaerobic Digestion
Source: MDPI journal article supplement (doi:10.3390/su15139994), 2023-06-24
Supplement: s1 [file s1]

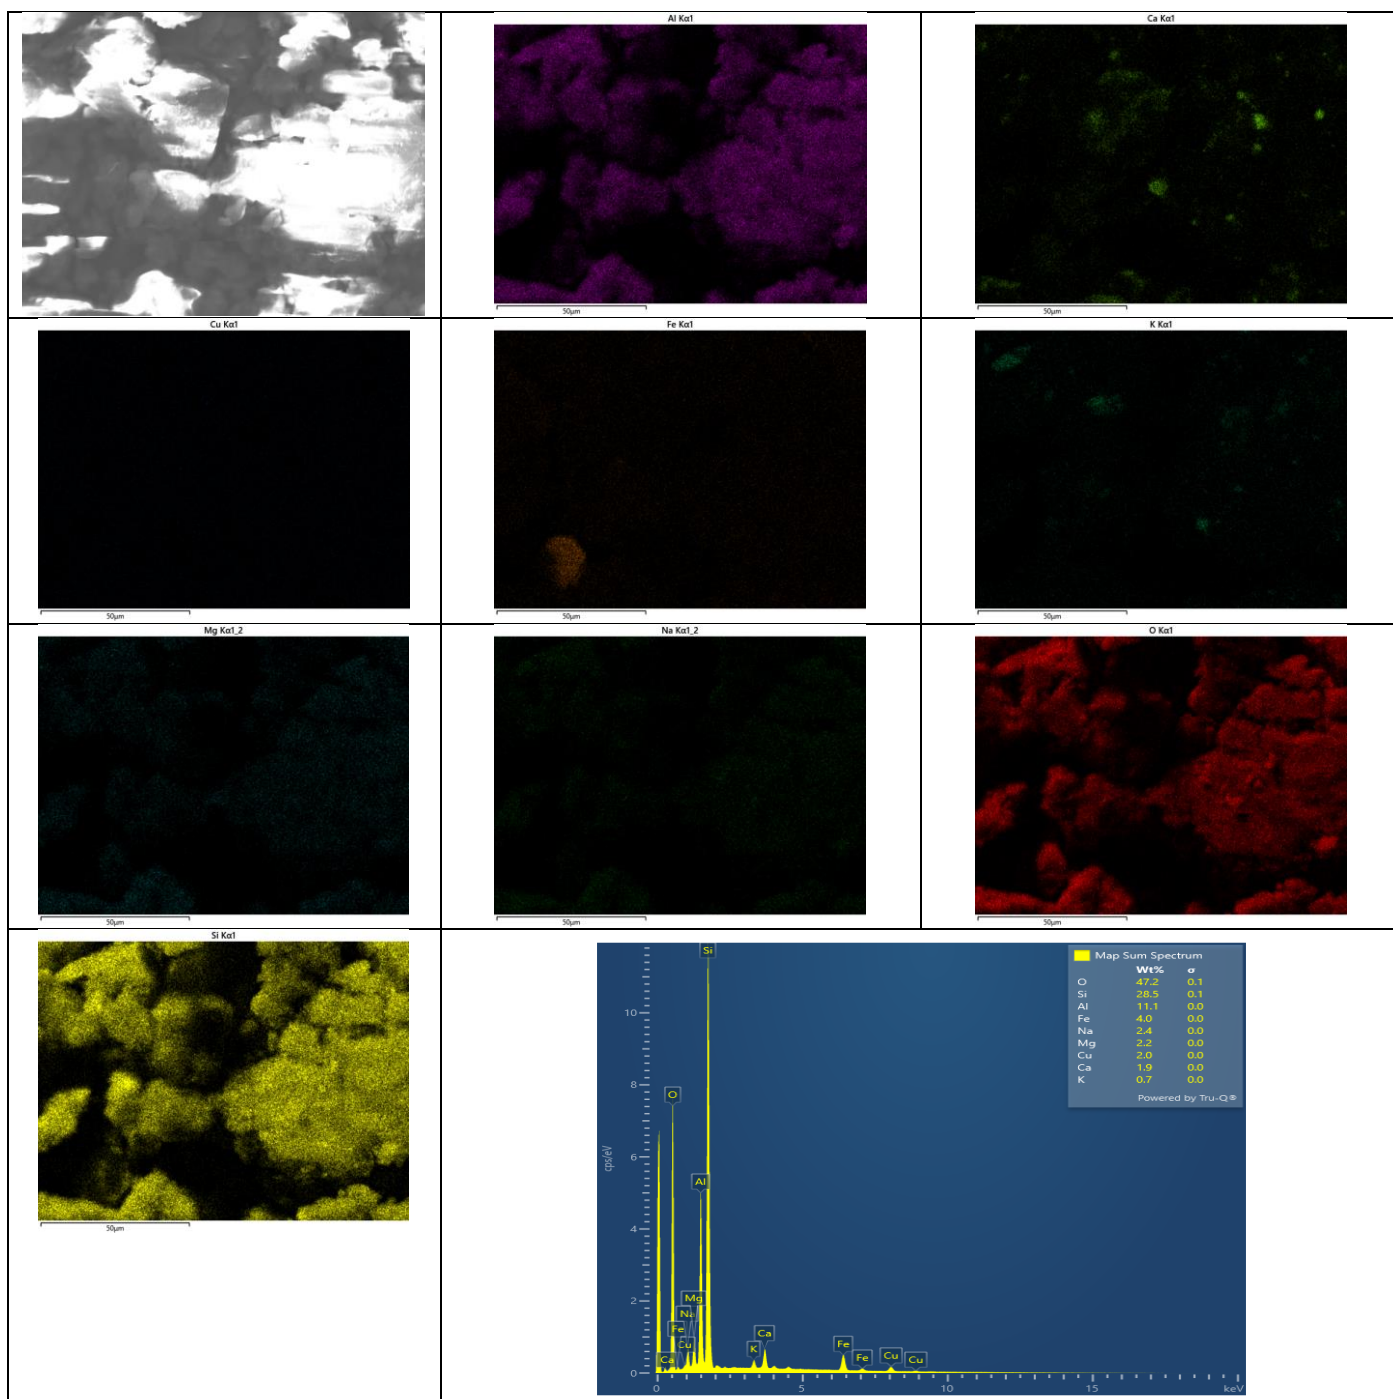

Figure S1: SEM micrograph of unmodified bentonite sample and the corresponding elemental maps

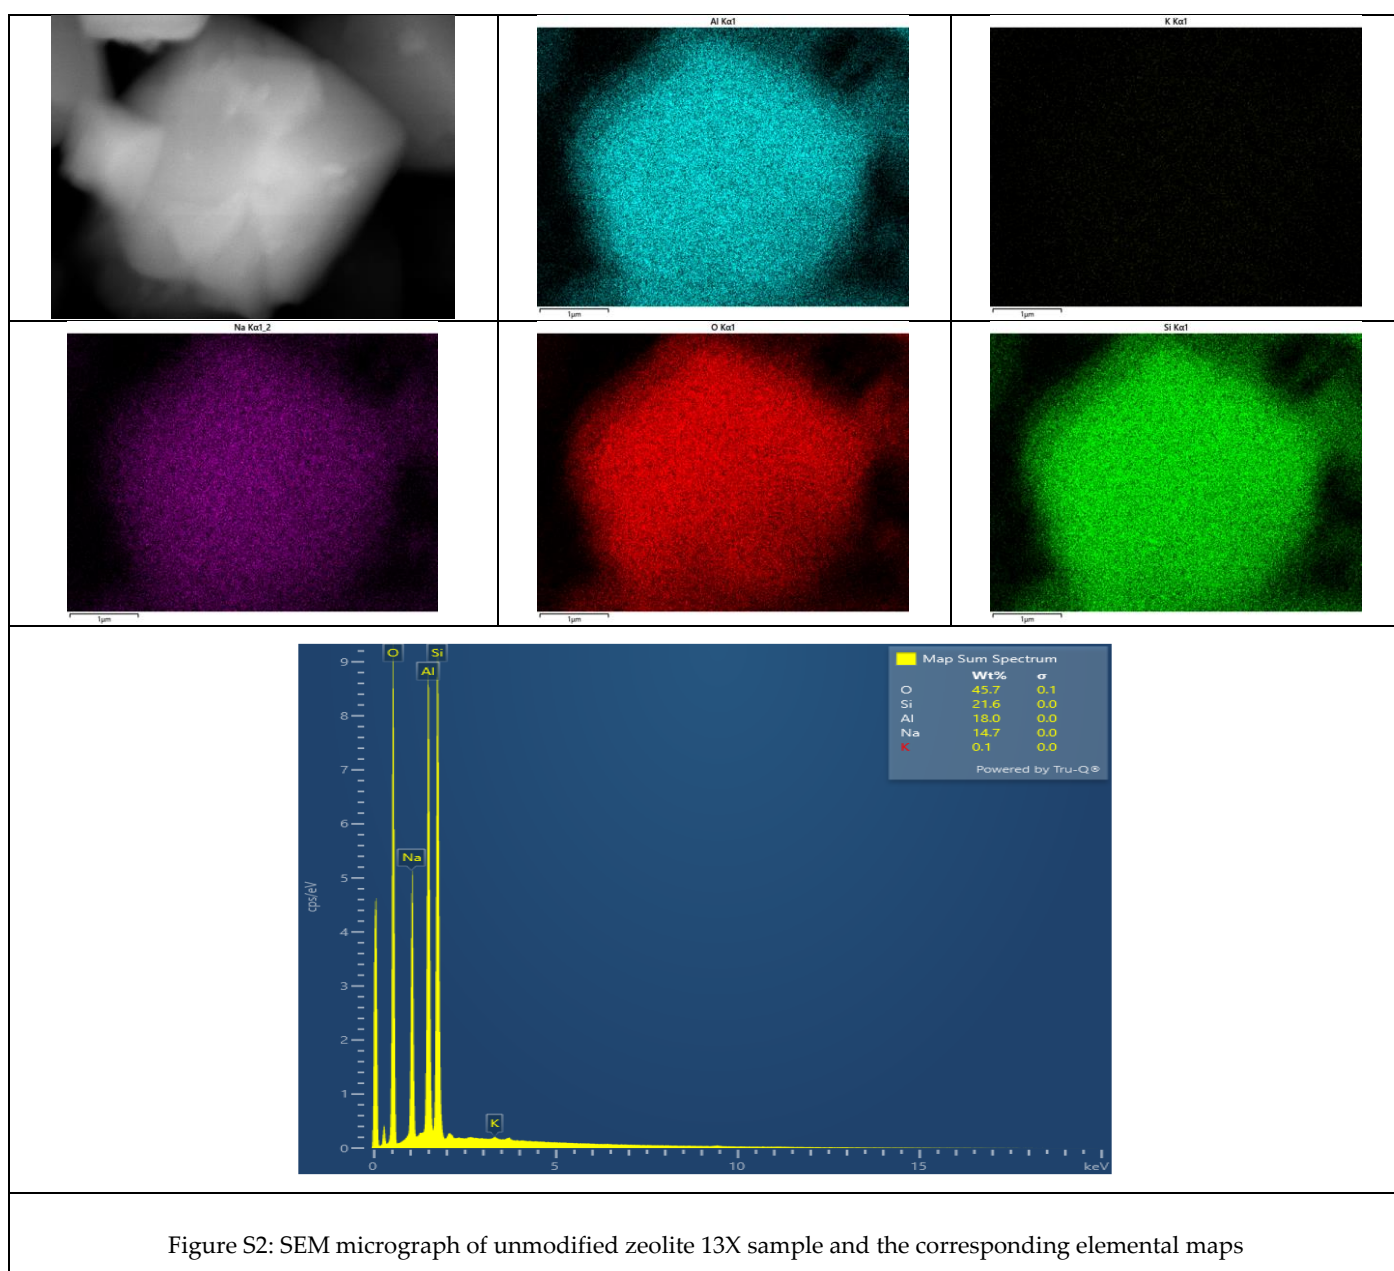

Figure S2: SEM micrograph of unmodified zeolite 13X sample and the corresponding elemental maps

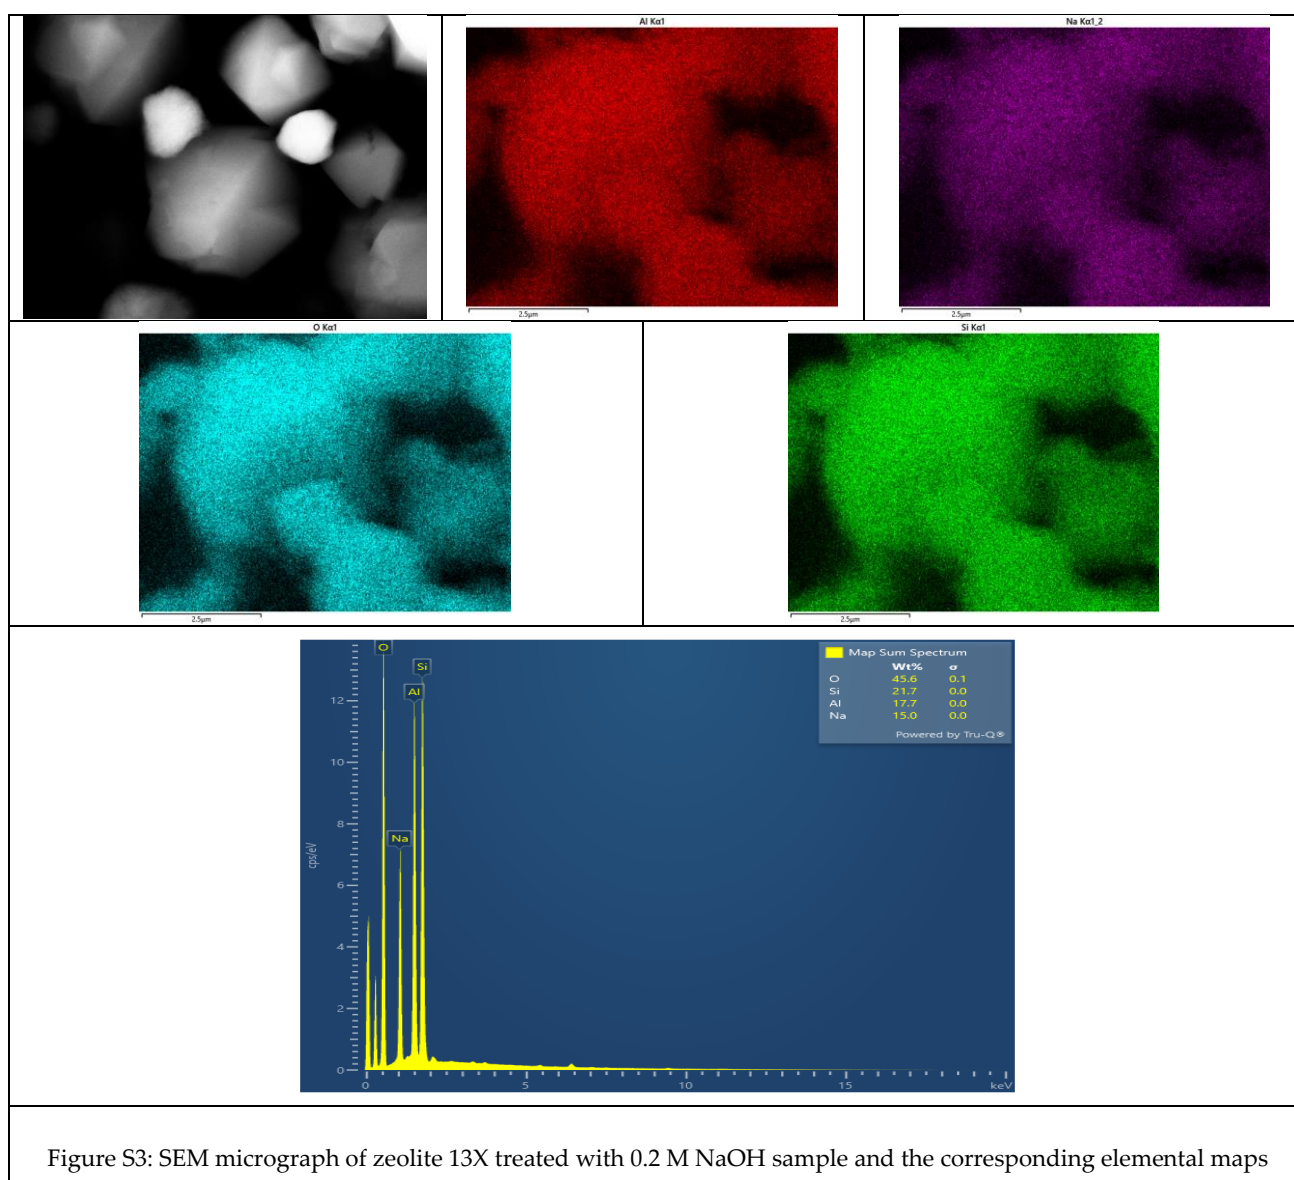

Figure S3: SEM micrograph of zeolite 13X treated with 0.2 M NaOH sample and the corresponding elemental maps

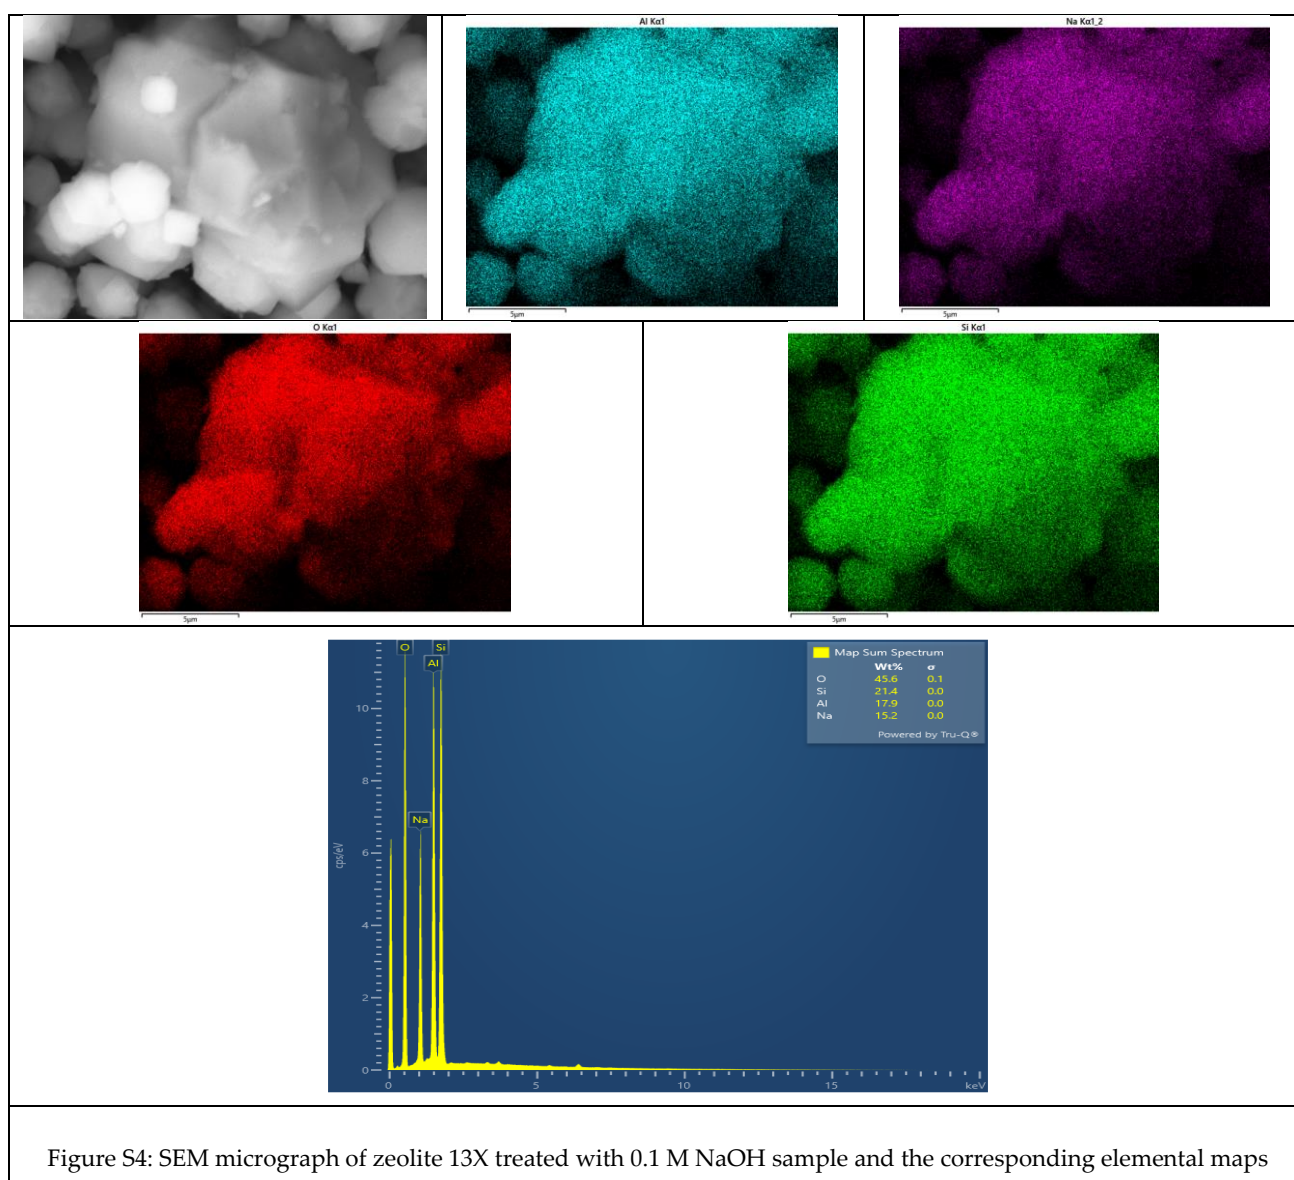

Figure S4: SEM micrograph of zeolite 13X treated with 0.1 M NaOH sample and the corresponding elemental maps



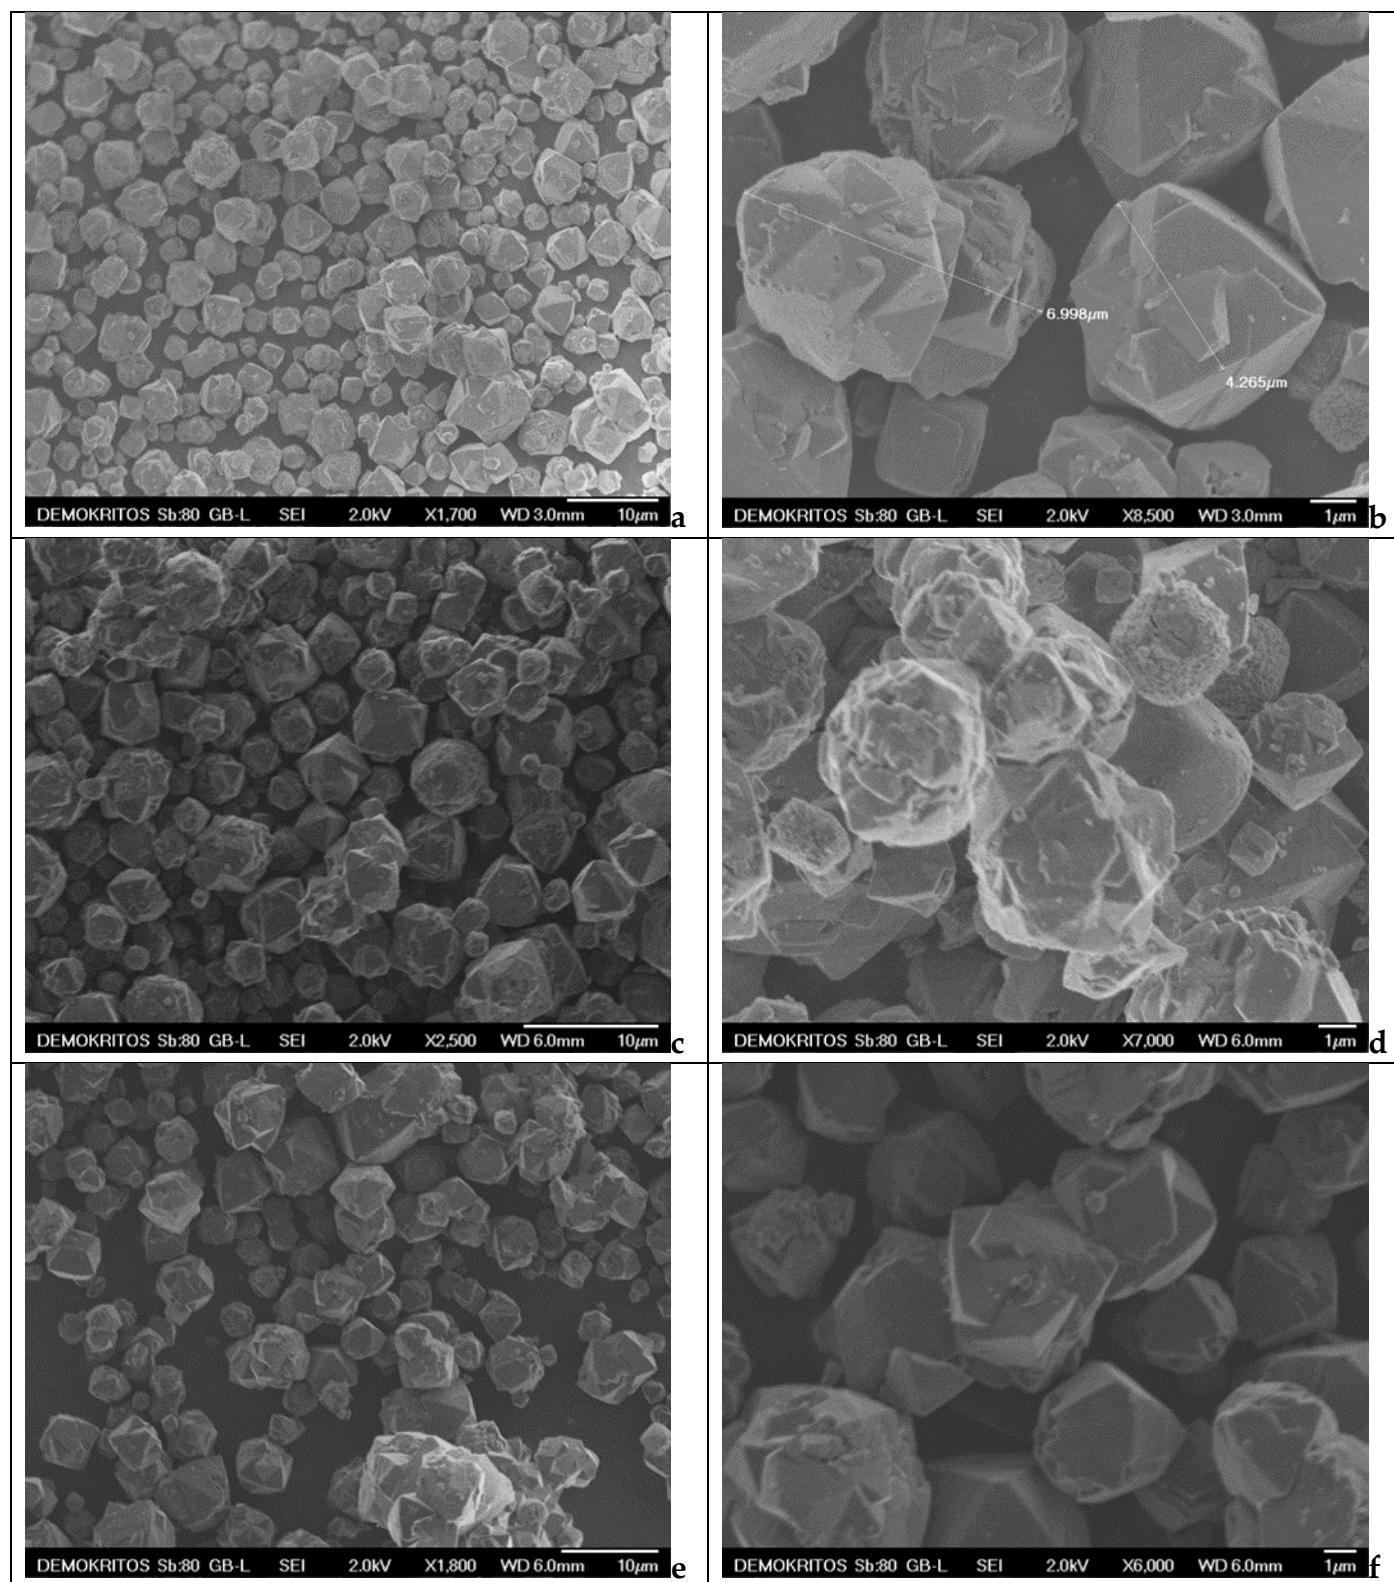

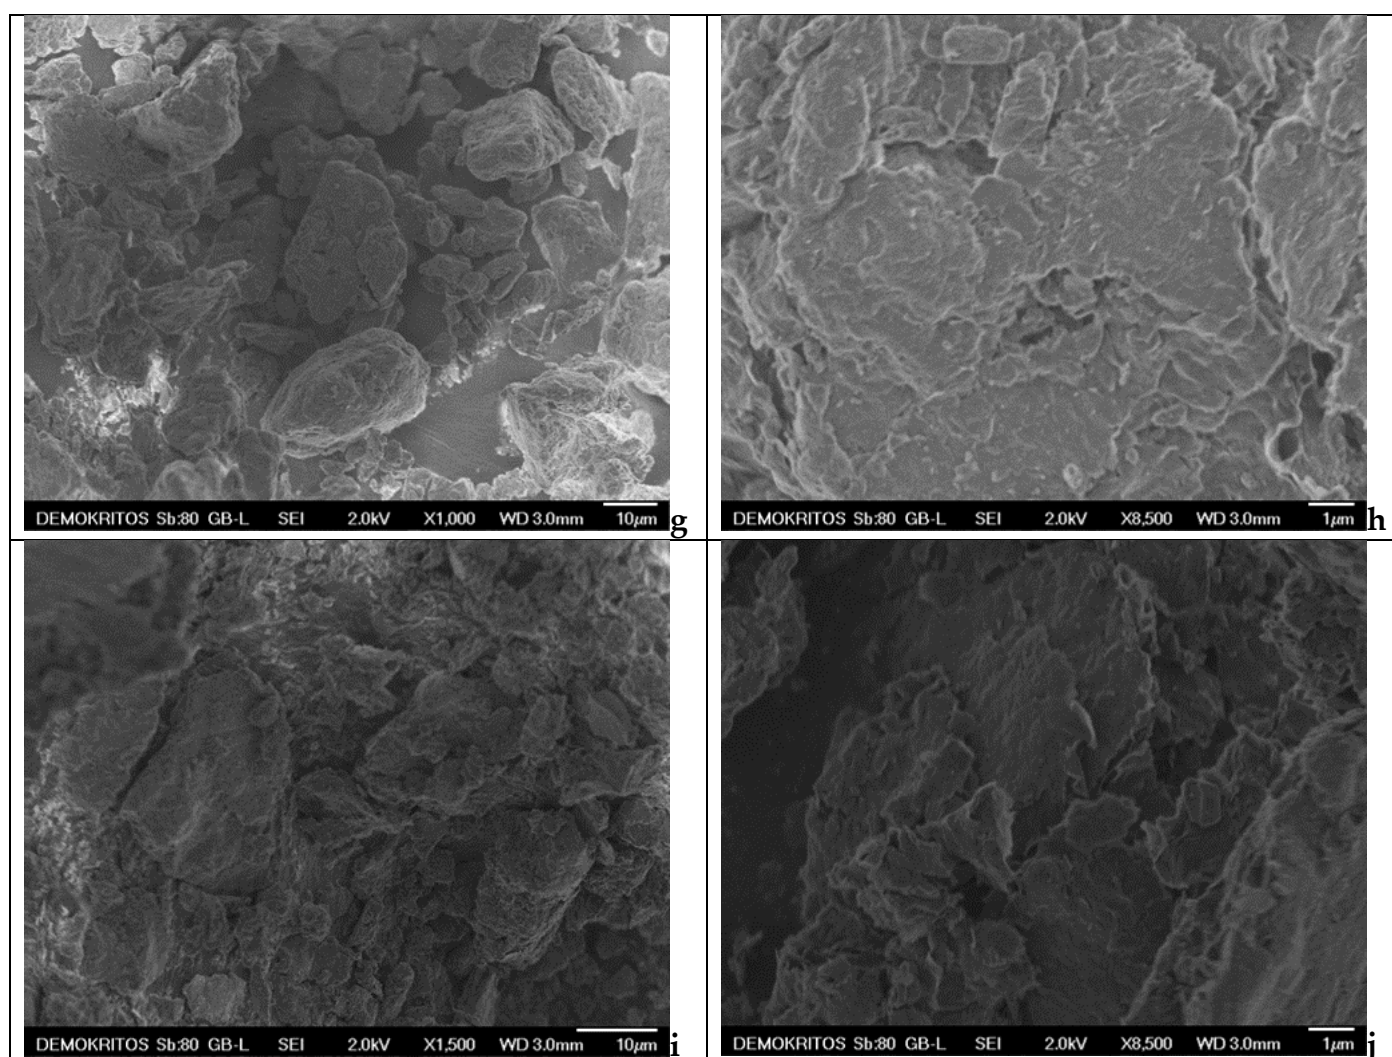

Figure S5. Low and high magnification SEM images of the pristine and NaOH treated samples showing the quite different morphological characteristics of the Bentonite and Zeolite 13X particles. (a, b and g, h) Low and high magnification SEM of the pristine 13X and Bentonite respectively. (c, d) Low and high magnification SEM of the 1M NaOH treated 13X. (e, f and i, j) Low and high magnification SEM of the 0.2M NaOH treated 13 X and Bentonite respectively. Comparison between Figures b, d and f show that the denser NaOH solution starts to erode the surface of the 13X crystal making visible the existence of surface roughness.

**Table S1. Second set: final TAN values of reactors' aqueous phase**

| Treatment | TAN (mg N L <sup>-1</sup> )<br>(value ± SD*) |
|-----------|----------------------------------------------|
| Be        | 3653 ± 73.22                                 |
| Be1       | 3598 ± 85.81                                 |
| 13X       | 3582 ± 59.75                                 |
| 13X02     | 3632 ± 77.85                                 |
| 13X1      | 3367 ± 42.69                                 |
| C0        | 2030 ± 77.36                                 |
| CNH3      | 3759 ± 90.15                                 |
| CSO4      | 1884 ± 41.95                                 |
| CNH3-SO4  | 3551 ± 62.27                                 |

\*SD, standard deviation.

**Table S2. First set: daily methane production without the subtraction of the Blank treatment's production (Mean ± SD\*)**

| Day | PBe          | PBe1         | P13X         | Treatment<br>P13X02 | P13X1        | PCNH3        | PC0          |
|-----|--------------|--------------|--------------|---------------------|--------------|--------------|--------------|
| 1   | 0.56 ± 0.02  | 1.27 ± 0.07  | 0.79 ± 0.01  | 0.94 ± 0.02         | 0.79 ± 0.01  | 1.31 ± 0.01  | 6.46 ± 0.05  |
| 2   | 0.68 ± 0.03  | 0.86 ± 0.08  | 0.38 ± 0.01  | 0.34 ± 0.01         | 0.35 ± 0.01  | 0.3 ± 0.03   | 11.9 ± 0.13  |
| 3   | 2.37 ± 0.05  | 3.02 ± 0.14  | 1.54 ± 0.02  | 1.6 ± 0.01          | 1.82 ± 0.04  | 2.06 ± 0.06  | 19.84 ± 0.14 |
| 4   | 3.27 ± 0.07  | 4.2 ± 0.18   | 2.48 ± 0.02  | 2.55 ± 0.01         | 2.55 ± 0.04  | 3.44 ± 0.08  | 33.56 ± 1.18 |
| 5   | 3.34 ± 0.12  | 6.41 ± 0.47  | 2.58 ± 0.1   | 2.47 ± 0.01         | 2.91 ± 0.11  | 3.91 ± 0.09  | 31.6 ± 1.14  |
| 6   | 5.94 ± 0.15  | 8.28 ± 0.55  | 2.67 ± 0.13  | 3.12 ± 0.04         | 2.82 ± 0.14  | 5.26 ± 0.19  | 31.36 ± 0.67 |
| 7   | 7.22 ± 0.29  | 9.9 ± 0.42   | 4.16 ± 0.06  | 3.87 ± 0.06         | 3.94 ± 0.09  | 8.45 ± 0.12  | 34.08 ± 1.22 |
| 8   | 11.19 ± 0.15 | 15.01 ± 0.61 | 6.48 ± 0.17  | 7.31 ± 0.05         | 7.23 ± 0.14  | 11.79 ± 0.13 | 30.56 ± 2.06 |
| 11  | 41.99 ± 0.69 | 47.89 ± 0.68 | 30.47 ± 0.26 | 30 ± 0.2            | 26.99 ± 0.26 | 44.56 ± 0.56 | 53.15 ± 3.5  |
| 13  | 30.07 ± 0.21 | 34.81 ± 0.18 | 23.14 ± 0.5  | 25.7 ± 0.26         | 24.91 ± 0.35 | 34.99 ± 0.32 | 12.34 ± 0.25 |
| 14  | 15.75 ± 0.21 | 17.78 ± 0.38 | 19.06 ± 0.19 | 17.44 ± 0.16        | 14.07 ± 0.16 | 19.78 ± 0.04 | 7.03 ± 0.3   |
| 15  | 16.68 ± 0.3  | 19.22 ± 0.21 | 16.96 ± 0.11 | 20.55 ± 0.21        | 14.94 ± 0.11 | 12.59 ± 0.22 | 5.87 ± 0.11  |
| 18  | 39.57 ± 2.35 | 47.13 ± 2.68 | 53.02 ± 1.32 | 51.83 ± 1.13        | 51.53 ± 2.04 | 38.04 ± 1.06 | 12.22 ± 0.2  |
| 22  | 43.62 ± 2.49 | 45.86 ± 0.52 | 54.44 ± 2.06 | 52.41 ± 1.23        | 50.6 ± 2.27  | 45.73 ± 1.72 | 2.47 ± 0.09  |
| 28  | 59.76 ± 1.24 | 46.64 ± 2.39 | 80.01 ± 1.57 | 77.16 ± 3.06        | 77.27 ± 3.15 | 56.26 ± 2.66 | 14.26 ± 1.15 |
| 35  | 19.27 ± 0.51 | 8.53 ± 0.04  | 16.57 ± 0.46 | 16.69 ± 0.3         | 17.36 ± 0.67 | 8.88 ± 0.54  | 15.11 ± 0.33 |

\*SD, Standard Deviation.

**Table S3. Second set: daily methane production without the subtraction of the Blank treatment's production (Mean  $\pm$  SD\*)**

| Day | Treatment        |                  |                  |                  |                  |                  |                  |                  |                  |
|-----|------------------|------------------|------------------|------------------|------------------|------------------|------------------|------------------|------------------|
|     | Be               | Be1              | 13X              | 13X02            | 13X1             | CNH3-SO4         | CNH3             | CSO4             | C0               |
| 1   | 2.06 $\pm$ 0.04  | 2.29 $\pm$ 0.01  | 1.6 $\pm$ 0.01   | 2.01 $\pm$ 0.1   | 2.4 $\pm$ 0.02   | 2.73 $\pm$ 0.06  | 1.44 $\pm$ 0.11  | 3.1 $\pm$ 0.04   | 2.8 $\pm$ 0.08   |
| 2   | 7.45 $\pm$ 0.03  | 7.24 $\pm$ 0.05  | 6.3 $\pm$ 0.05   | 7.22 $\pm$ 0.09  | 8.2 $\pm$ 0.35   | 9.75 $\pm$ 0.11  | 9.41 $\pm$ 0.12  | 16.7 $\pm$ 0.42  | 14.69 $\pm$ 0.19 |
| 3   | 11.47 $\pm$ 0.16 | 12.07 $\pm$ 0.42 | 10.86 $\pm$ 0.12 | 9.74 $\pm$ 0.29  | 12.75 $\pm$ 0.4  | 13.9 $\pm$ 0.31  | 14.7 $\pm$ 0.19  | 26.69 $\pm$ 1.17 | 25.55 $\pm$ 0.35 |
| 4   | 16.39 $\pm$ 0.19 | 19.66 $\pm$ 0.28 | 17.31 $\pm$ 0.13 | 19.25 $\pm$ 0.15 | 19.28 $\pm$ 0.23 | 18.11 $\pm$ 0.08 | 23.44 $\pm$ 0.64 | 30.38 $\pm$ 1.07 | 32 $\pm$ 1.26    |
| 5   | 17.69 $\pm$ 0.17 | 18.86 $\pm$ 0.37 | 17.31 $\pm$ 0.15 | 17.95 $\pm$ 0.05 | 18.68 $\pm$ 0.18 | 18.01 $\pm$ 0.02 | 23.84 $\pm$ 0.21 | 31.58 $\pm$ 1.21 | 31.9 $\pm$ 1.3   |
| 6   | 16.63 $\pm$ 0.2  | 17.48 $\pm$ 0.37 | 16.84 $\pm$ 0.19 | 17.94 $\pm$ 0.02 | 17.86 $\pm$ 0.14 | 19.16 $\pm$ 0.11 | 19.82 $\pm$ 0.31 | 27 $\pm$ 1.58    | 32.93 $\pm$ 1.26 |
| 7   | 16.77 $\pm$ 0.12 | 15.79 $\pm$ 0.14 | 16.21 $\pm$ 0.1  | 17.29 $\pm$ 0.21 | 17.9 $\pm$ 0.1   | 19.76 $\pm$ 0.14 | 17.21 $\pm$ 0.15 | 19.05 $\pm$ 0.29 | 27.58 $\pm$ 1.38 |
| 8   | 16.17 $\pm$ 0.11 | 15.99 $\pm$ 0.21 | 16.61 $\pm$ 0.08 | 17.79 $\pm$ 0.05 | 16.6 $\pm$ 0.2   | 17.76 $\pm$ 0.33 | 17.21 $\pm$ 0.19 | 15.45 $\pm$ 0.26 | 27.38 $\pm$ 0.93 |
| 9   | 14.23 $\pm$ 0.17 | 13.52 $\pm$ 0.33 | 15.32 $\pm$ 0.3  | 15.85 $\pm$ 0.31 | 15.27 $\pm$ 0.5  | 12.17 $\pm$ 0.33 | 18.44 $\pm$ 0.32 | 2.76 $\pm$ 0.26  | 12.36 $\pm$ 0.32 |
| 10  | 14.33 $\pm$ 0.22 | 13.22 $\pm$ 0.21 | 16.52 $\pm$ 0.32 | 14.65 $\pm$ 0.26 | 15.87 $\pm$ 0.47 | 13.07 $\pm$ 0.15 | 19.04 $\pm$ 0.18 | 2.76 $\pm$ 0.06  | 12.06 $\pm$ 0.31 |
| 11  | 8.74 $\pm$ 0.47  | 7.5 $\pm$ 0.62   | 9.48 $\pm$ 0.39  | 9.47 $\pm$ 0.35  | 9.87 $\pm$ 0.11  | 8.54 $\pm$ 0.29  | 13.89 $\pm$ 0.32 | 1.94 $\pm$ 0.03  | 8.22 $\pm$ 0.53  |
| 12  | 3.98 $\pm$ 0.07  | 3.99 $\pm$ 0.16  | 6.31 $\pm$ 0.22  | 6.5 $\pm$ 0.21   | 6.82 $\pm$ 0.38  | 4.86 $\pm$ 0.12  | 11.32 $\pm$ 0.18 | 1.3 $\pm$ 0.07   | 4.26 $\pm$ 0.14  |
| 13  | 4.08 $\pm$ 0.05  | 4.89 $\pm$ 0.25  | 6.61 $\pm$ 0.07  | 6.2 $\pm$ 0.29   | 6.52 $\pm$ 0.36  | 3.86 $\pm$ 0.31  | 10.72 $\pm$ 0.04 | 2.1 $\pm$ 0.11   | 3.46 $\pm$ 0.01  |
| 14  | 4.98 $\pm$ 0.14  | 4.69 $\pm$ 0.07  | 6.41 $\pm$ 0.16  | 6.4 $\pm$ 0.21   | 6.12 $\pm$ 0.21  | 3.69 $\pm$ 0.01  | 11.02 $\pm$ 0.08 | 1.4 $\pm$ 0.1    | 3.96 $\pm$ 0.02  |
| 15  | 5.68 $\pm$ 0.15  | 5.29 $\pm$ 0.22  | 5.71 $\pm$ 0.18  | 6.1 $\pm$ 0.24   | 5.42 $\pm$ 0.32  | 3.19 $\pm$ 0.12  | 10.02 $\pm$ 0.15 | 1.3 $\pm$ 0.02   | 3.56 $\pm$ 0.03  |
| 16  | 1.74 $\pm$ 0.32  | 3.29 $\pm$ 0.34  | 2.19 $\pm$ 0.08  | 2.1 $\pm$ 0.05   | 2.29 $\pm$ 0.22  | 2.79 $\pm$ 0.14  | 5.68 $\pm$ 0.46  | 1.59 $\pm$ 0.19  | 3.57 $\pm$ 0.18  |
| 17  | 1.08 $\pm$ 0.03  | 1.84 $\pm$ 0.16  | 1.64 $\pm$ 0.06  | 1.42 $\pm$ 0.13  | 2.5 $\pm$ 0.05   | 2.31 $\pm$ 0.16  | 2.65 $\pm$ 0.18  | 0.6 $\pm$ 0.02   | 3.69 $\pm$ 0.14  |
| 18  | 1.08 $\pm$ 0.08  | 0.54 $\pm$ 0.1   | 1.14 $\pm$ 0.04  | 1.02 $\pm$ 0.03  | 2.7 $\pm$ 0.07   | 2.91 $\pm$ 0.19  | 1.95 $\pm$ 0.2   | 1 $\pm$ 0.05     | 3.29 $\pm$ 0.12  |
| 19  | 0.98 $\pm$ 0.01  | 0.24 $\pm$ 0.16  | 0.54 $\pm$ 0.09  | 1.42 $\pm$ 0.12  | 2.3 $\pm$ 0.11   | 0.49 $\pm$ 0.1   | 1.45 $\pm$ 0.03  | 0.4 $\pm$ 0.06   | 1.09 $\pm$ 0.01  |
| 20  | 1.58 $\pm$ 0.01  | 1.44 $\pm$ 0.14  | 0.54 $\pm$ 0.06  | 1.22 $\pm$ 0.12  | 2 $\pm$ 0.03     | 0.91 $\pm$ 0.01  | 3.35 $\pm$ 0.06  | 0.3 $\pm$ 0.04   | 2.79 $\pm$ 0.01  |
| 21  | 1.18 $\pm$ 0.07  | 1.94 $\pm$ 0.2   | 2.04 $\pm$ 0.01  | 1.12 $\pm$ 0.11  | 1.5 $\pm$ 0.04   | 0.41 $\pm$ 0.06  | 2.25 $\pm$ 0.05  | 0.5 $\pm$ 0.07   | 2.09 $\pm$ 0.02  |
| 22  | 0.98 $\pm$ 0.05  | 0.64 $\pm$ 0.01  | 1.84 $\pm$ 0.05  | 0.82 $\pm$ 0.12  | 1.1 $\pm$ 0.02   | 0.19 $\pm$ 0.01  | 2.85 $\pm$ 0.12  | 0.2 $\pm$ 0.04   | 0.69 $\pm$ 0.16  |
| 23  | 0.54 $\pm$ 0.01  | 1.99 $\pm$ 0.16  | 1.34 $\pm$ 0.03  | 0.57 $\pm$ 0.07  | 0.86 $\pm$ 0.05  | 0.9 $\pm$ 0.13   | 2.79 $\pm$ 0.1   | 0.99 $\pm$ 0.07  | 1.42 $\pm$ 0.02  |
| 24  | 1.03 $\pm$ 0.03  | 1.03 $\pm$ 0.15  | 2.01 $\pm$ 0.02  | 0.93 $\pm$ 0.15  | 0.38 $\pm$ 0.03  | 0.59 $\pm$ 0     | 0.94 $\pm$ 0.15  | 0.14 $\pm$ 0.02  | 1.21 $\pm$ 0.04  |
| 25  | 1.43 $\pm$ 0.03  | 0.33 $\pm$ 0.02  | 0.51 $\pm$ 0.01  | 0.73 $\pm$ 0.02  | 0.48 $\pm$ 0.03  | 0.79 $\pm$ 0.06  | 1.34 $\pm$ 0.03  | 0.46 $\pm$ 0.05  | 1.09 $\pm$ 0.12  |
| 26  | 1.53 $\pm$ 0.02  | 1.43 $\pm$ 0.09  | 1.21 $\pm$ 0.11  | 1.43 $\pm$ 0.09  | 0.18 $\pm$ 0.09  | 0.39 $\pm$ 0.05  | 1.24 $\pm$ 0.06  | 0.64 $\pm$ 0.08  | 0.21 $\pm$ 0.12  |
| 27  | 1.24 $\pm$ 0.08  | 1.73 $\pm$ 0.11  | 0.91 $\pm$ 0.12  | 0.93 $\pm$ 0.06  | 0.48 $\pm$ 0.03  | 0.79 $\pm$ 0.02  | 0.84 $\pm$ 0.18  | 0.44 $\pm$ 0.06  | 0.29 $\pm$ 0.05  |
| 28  | 1.83 $\pm$ 0.09  | 0.73 $\pm$ 0.05  | 1.91 $\pm$ 0.01  | 1.33 $\pm$ 0.04  | 1.08 $\pm$ 0.12  | 0.39 $\pm$ 0.03  | 1.84 $\pm$ 0.06  | 0.84 $\pm$ 0.06  | 0.21 $\pm$ 0.05  |
| 29  | 0.53 $\pm$ 0.02  | 1.03 $\pm$ 0.1   | 1.31 $\pm$ 0.03  | 0.73 $\pm$ 0.04  | 0.48 $\pm$ 0.02  | 0.69 $\pm$ 0.05  | 1.14 $\pm$ 0.02  | 0.26 $\pm$ 0.08  | 0.81 $\pm$ 0.02  |
| 30  | 0.63 $\pm$ 0.08  | 2.03 $\pm$ 0.04  | 0.81 $\pm$ 0.06  | 0.63 $\pm$ 0.02  | 0.68 $\pm$ 0.09  | 0.39 $\pm$ 0.1   | 0.84 $\pm$ 0.12  | 0.44 $\pm$ 0.03  | 0.61 $\pm$ 0.14  |

\*SD, Standard Deviation.
